# Supplementary material
Source: publisher site journal article supplement (https://www.kjim.org/upload/media/kjim-2020-195-suppl2.pdf)
Supplement: Supplementary file 1 [file kjim-2020-195-suppl2.pdf]

**Supplementary Table 2. Pathologic diagnosis in 1,932 NDRD patients**

| Pathologic diagnosis                  | Number | % among NDRD |
|---------------------------------------|--------|--------------|
| IGAN                                  | 473    | 23.1         |
| MN                                    | 296    | 14.5         |
| FSGS                                  | 226    | 11.0         |
| MCD                                   | 153    | 7.5          |
| MPGN                                  | 86     | 4.2          |
| NONSPFGN                              | 85     | 4.2          |
| CRESGN                                | 82     | 4.0          |
| ATIN                                  | 81     | 4.0          |
| SCLEROSIS                             | 80     | 3.9          |
| ATN                                   | 76     | 3.7          |
| HT-N                                  | 73     | 3.6          |
| CTIN                                  | 47     | 2.3          |
| LN                                    | 42     | 2.1          |
| INADEQUATE                            | 28     | 1.4          |
| AMYLODIOSIS                           | 22     | 1.1          |
| PIGN                                  | 22     | 1.1          |
| HSN                                   | 19     | 0.9          |
| NORMAL                                | 18     | 0.9          |
| THIN                                  | 18     | 0.9          |
| TIN                                   | 18     | 0.9          |
| TMA                                   | 18     | 0.9          |
| VASCULITIS                            | 18     | 0.9          |
| ACTIN                                 | 17     | 0.8          |
| MYELOMA                               | 16     | 0.8          |
| LCDD                                  | 5      | 0.2          |
| C <sub>3</sub> G                      | 4      | 0.2          |
| IGMN                                  | 4      | 0.2          |
| ANTIGBM                               | 3      | 0.1          |
| C <sub>1</sub> Q                      | 3      | 0.1          |
| LC-N                                  | 3      | 0.1          |
| APN                                   | 2      | 0.1          |
| FIBRILLARY                            | 2      | 0.1          |
| ALPORT                                | 1      | 0.0          |
| ANALGESIC                             | 1      | 0.0          |
| CPN                                   | 1      | 0.0          |
| CRYO                                  | 1      | 0.0          |
| ECD                                   | 1      | 0.0          |
| ISCHEMIC                              | 1      | 0.0          |
| HFRS                                  | 1      | 0.0          |
| Number of diagnosis                   | 2,047  |              |
| Number of patients                    | 1,932  |              |
| Number of patients with two diagnosis | 115    |              |

NDRD, non-diabetic renal disease; IGAN, IgA nephropathy; MN, membranous nephropathy; FSGS, focal segmental glomerulosclerosis; MCD, minimal change disease; MPGN, membranoproliferative glomerulonephritis; NONSPFGN, non-specific glomerulonephritis; CRESGN, crescentic glomerulonephritis; ATIN, acute tubulointerstitial nephritis; ATN, acute tubular necrosis; HT-N, hypertensive nephrosclerosis; CTIN, chronic tubulointerstitial nephritis; LN, lupus nephritis; PIGN, post-infectious glomerulonephritis; HSN, Henoch-Schonlein nephritis; THIN, thin membrane disease; TIN, tubulointerstitial nephritis; TMA, thrombotic microangiopathy; ACTIN, acute and chronic tubulointerstitial nephritis; LCDD, light chain deposition disease; C<sub>3</sub>G, C<sub>3</sub> glomerulopathy; IGMN, IgM nephropathy; GBM, glomerular basement membrane; LC-N, liver cirrhosis-related nephropathy; APN, acute pyelonephritis; CPN, chronic pyelonephritis; CRYO, cryoglobulinemic glomerulonephritis; ECD, Erdheim-Chester disease; HFRS, hemorrhagic fever with renal syndrome.
